# Supplementary material
Source: PubMed Central journal article supplement (PMC2585401)
Supplement: 90210.2008_1.pdf [file 90210.2008_1.pdf]

| ITD           | Bandwidth         | Percept | Lateralization of brain responses                                                 |                                                                           |
|---------------|-------------------|---------|-----------------------------------------------------------------------------------|---------------------------------------------------------------------------|
|               |                   |         | Weighted-image model                                                              | $\pi$ -limit model                                                        |
| -500 $\mu$ s  | 50 Hz<br>(narrow) | left    | right                                                                             | right                                                                     |
| -1500 $\mu$ s | 50 Hz<br>(narrow) | right   | left (because of more ITD detectors at +500 $\mu$ s than at -1500 $\mu$ s)        | left (because of ITD detectors at +500 $\mu$ s but none at -1500 $\mu$ s) |
| -500 $\mu$ s  | 500 Hz<br>(broad) | left    | right                                                                             | right                                                                     |
| -1500 $\mu$ s | 500 Hz<br>(broad) | left    | right (because of straightness weighting operating on the -1500 $\mu$ s channels) | left (because of ITD detectors at +500 $\mu$ s but none at -1500 $\mu$ s) |

**Supplementary Table 1**
