# Supplementary material
Source: PubMed Central journal article supplement (PMC2585401)

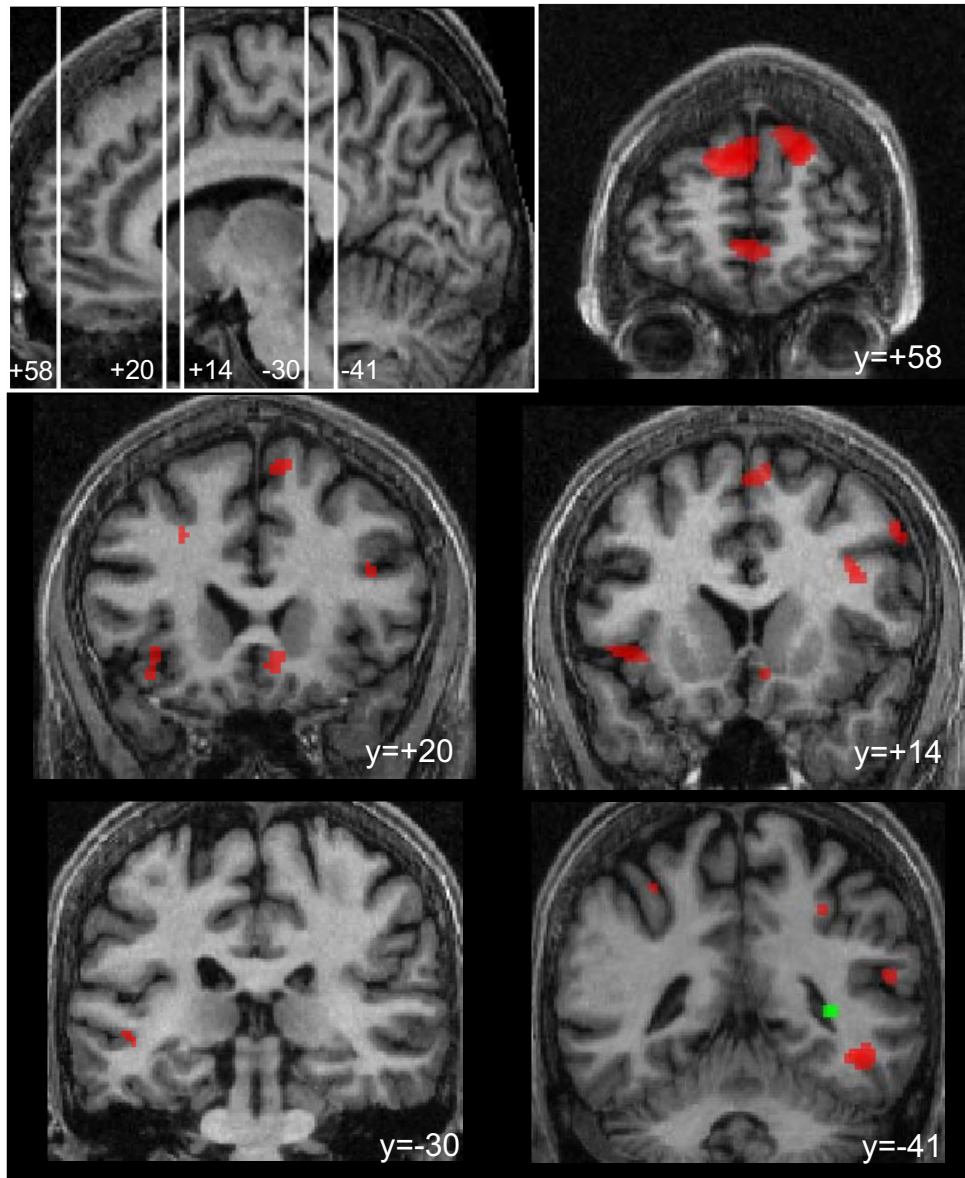

Supplementary Figure 2

Supplement: 90210.2008_3.pdf [file 90210.2008_3.pdf]
